# Supplementary material for: Trophic niche but not abundance of Collembola and Oribatida changes with drought and farming system
Source: PubMed Central journal article supplement (PMC8761369; doi:10.7717/peerj.12777), 2022-01-13
Supplement: peerj-10-12777-s001.pdf [file peerj-10-12777-s001.pdf]

Table S1: Soil characteristics in the conventional (“ConMin” of the DOK-trial) and the organic (“BioDyn”) farming system. Mean  $\pm$  SE.

|                                             | Farming system        |                     |
|---------------------------------------------|-----------------------|---------------------|
|                                             | conventional          | organic             |
| pH (in water)                               | 6.03 $\pm$ 0.1        | 6.63 $\pm$ 0.04     |
| WHC (0-10 cm) [%]                           | 39.16 $\pm$ 0.89      | 42.03 $\pm$ 1.23    |
| bulk density (0-10 cm) [g/cm <sup>3</sup> ] | 1.21 $\pm$ 0.02       | 1.17 $\pm$ 0.03     |
| C <sub>tot</sub> [%]                        | 1.27 $\pm$ 0.05       | 1.60 $\pm$ 0.03     |
| N <sub>tot</sub> [%]                        | 0.13 $\pm$ 0          | 0.17 $\pm$ 0        |
| PO <sub>4</sub> -P [ $\mu$ g/g DW]          | 0.00104 $\pm$ 0.00005 | 0.001 $\pm$ 0.00005 |
| P [mg/g DW]                                 | 0.827 $\pm$ 0.014     | 0.801 $\pm$ 0.024   |
