# Supplementary material for: Trophic niche but not abundance of Collembola and Oribatida changes with drought and farming system
Source: PubMed Central journal article supplement (PMC8761369; doi:10.7717/peerj.12777), 2022-01-13

March

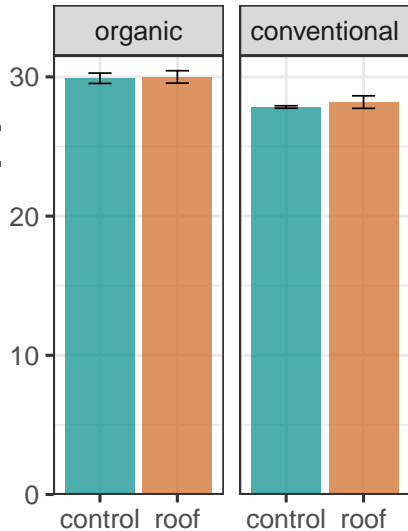

April

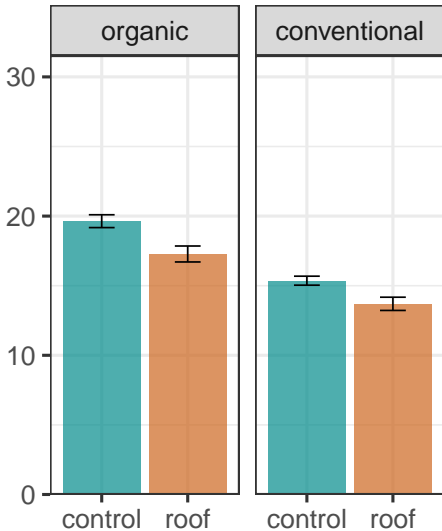

May

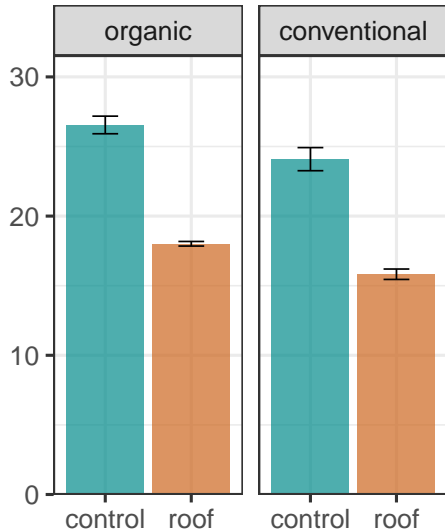

Supplement: peerj-10-12777-s002.pdf [file peerj-10-12777-s002.pdf]
