# Supplementary material for: Trophic niche but not abundance of Collembola and Oribatida changes with drought and farming system
Source: PeerJ. 2022 Jan 13;10:e12777. doi: 10.7717/peerj.12777 (PMC8761369; doi:10.7717/peerj.12777)
Supplement: Supplemental Information 5 [file peerj-10-12777-s005.xlsx]

## Sheet: read me
Species	species identity
Farming system	CONMIN ("conventional") and BIODYN ("organic") systems of the DOK trial
Field	Field identity with numbers used in the DOK trial
Drought	roof plots with 65% rain exclusion, control plots without rainexclusion
Abundances	original count data from the respective soil cores; note that Oribatida (Scheloribates laevigatus and Tectocepheus sarakensis) and Mesaphorura were taken from small soil cores (5cm diameter and 10 cm depth) and all other Collembola (Isotoma caerulea, Isotomurus maculatus, Orchesella villosa) from large soil cores (21 cm diameter and 10 cm depth)
Stable isotopes	dX = (RSAMPLE / RSTANDARD) / RSTANDARD x 1000 with X representing the target isotope (13C, 15N), and RSAMPLE and RSTANDARD the ratios of the heavy to the light isotope (13C/12C, 15N/14N)

## Sheet: abundances
Farming system	Field	Drought	Scheloribates laevigatus	Tectocepheus sarakensis	Mesaphorura sp.	Isotoma caerulea	Isotomurus maculatus	Orchesella villosa
conventional	2	control	10	12	5	1	2	3
organic	8	control	50	15	9	0	0	0
conventional	42	control	11	19	34	1	12	22
organic	48	control	4	3	6	15	2	8
organic	52	control	19	31	0	12	8	13
conventional	58	control	7	14	0	3	10	19
organic	86	control	15	32	13	1	6	4
conventional	92	control	5	21	0	4	0	3
conventional	2	roof	20	17	5	0	0	3
organic	8	roof	18	18	22	3	1	6
conventional	42	roof	21	25	2	1	2	20
organic	48	roof	9	2	42	6	0	4
organic	52	roof	30	15	0	4	9	6
conventional	58	roof	6	1	0	0	7	13
organic	86	roof	11	2	27	0	0	0
conventional	92	roof	3	4	1	10	1	6

## Sheet: stable isotopes animals
Species	Farming system	Field	Drought	d15N	d13C
Isotoma caerulea	conventional	2	control	-0.33	-27.97
Isotoma caerulea	conventional	42	roof	-4.25	-28.1
Isotoma caerulea	conventional	42	control	-4.57	-27.58
Isotoma caerulea	organic	48	roof	5.49	-27.72
Isotoma caerulea	organic	48	roof	3.23	-27.59
Isotoma caerulea	organic	48	control	5.22	-28.16
Isotoma caerulea	organic	48	control	7.04	-27.19
Isotoma caerulea	organic	48	control	6.39	-27.18
Isotoma caerulea	organic	52	roof	4.25	-27.65
Isotoma caerulea	organic	52	control	6.95	-27.06
Isotoma caerulea	organic	52	control	6.22	-27.45
Isotoma caerulea	conventional	58	control	0.54	-24.52
Isotoma caerulea	organic	86	control	5.97	-27.12
Isotoma caerulea	organic	8	roof	3.48	-27.22
Isotoma caerulea	conventional	92	roof	-0.85	-28.99
Isotoma caerulea	conventional	92	roof	-0.9	-28.7
Isotoma caerulea	conventional	92	roof	-1.02	-28.54
Isotoma caerulea	conventional	92	control	-2.27	-29.88
Isotoma caerulea	conventional	92	control	-3.49	-29.43
Isotomurus maculatus	conventional	2	control	0.44	-20.28
Isotomurus maculatus	conventional	42	roof	-2.19	-26.61
Isotomurus maculatus	conventional	42	control	-3.01	-26.7
Isotomurus maculatus	conventional	42	control	-4.89	-25.88
Isotomurus maculatus	organic	48	roof	-1.5	-27.08
Isotomurus maculatus	organic	48	control	3.54	-27.72
Isotomurus maculatus	organic	52	roof	5.31	-27.6
Isotomurus maculatus	organic	52	roof	3.24	-26.86
Isotomurus maculatus	organic	52	roof	14.55	-28.03
Isotomurus maculatus	organic	52	control	4.86	-27.25
Isotomurus maculatus	organic	52	control	6.13	-26.89
Isotomurus maculatus	conventional	58	roof	2.81	-27.64
Isotomurus maculatus	conventional	58	roof	-3.74	-28.23
Isotomurus maculatus	conventional	58	control	0.66	-26.79
Isotomurus maculatus	conventional	58	control	0.15	-23.74
Isotomurus maculatus	organic	86	control	5.77	-26.98
Isotomurus maculatus	organic	86	control	6.46	-27.44
Isotomurus maculatus	organic	8	roof	3.84	-26.77
Isotomurus maculatus	conventional	92	roof	0.52	-27.07
Mesaphorura sp.	conventional	2	roof	10.74	-24.1
Mesaphorura sp.	conventional	2	control	9.97	-22.72
Mesaphorura sp.	conventional	42	roof	45.28	-22.91
Mesaphorura sp.	conventional	42	control	3.54	-26.91
Mesaphorura sp.	conventional	42	control	9.78	-27.22
Mesaphorura sp.	conventional	42	control	26.62	-25.81
Mesaphorura sp.	organic	48	roof	22.5	-24.64
Mesaphorura sp.	organic	48	roof	8.69	-24.35
Mesaphorura sp.	organic	48	roof	8.53	-27.64
Mesaphorura sp.	organic	48	control	25.08	-23.75
Mesaphorura sp.	organic	86	roof	18.36	-25.87
Mesaphorura sp.	organic	86	roof	9.91	-25.52
Mesaphorura sp.	organic	86	control	21.48	-24.44
Mesaphorura sp.	organic	86	control	2.14	-23.83
Mesaphorura sp.	organic	8	roof	12.81	-26.18
Mesaphorura sp.	organic	8	roof	20.41	-25.71
Mesaphorura sp.	organic	8	control	12.87	-25.64
Orchesella villosa	conventional	2	roof	2.47	-26.57
Orchesella villosa	conventional	2	control	5.66	-25.16
Orchesella villosa	conventional	42	roof	-1.7	-26.79
Orchesella villosa	conventional	42	roof	-2.36	-26.9
Orchesella villosa	conventional	42	roof	-1.97	-27.11
Orchesella villosa	conventional	42	control	-2.17	-26.31
Orchesella villosa	conventional	42	control	-1.17	-26.3
Orchesella villosa	conventional	42	control	-1.28	-26.12
Orchesella villosa	organic	48	roof	7.16	-27.41
Orchesella villosa	organic	48	control	8.97	-27.06
Orchesella villosa	organic	48	control	7.31	-27.13
Orchesella villosa	organic	52	roof	7.05	-27.27
Orchesella villosa	organic	52	roof	8.41	-26.34
Orchesella villosa	organic	52	control	7.21	-25.95
Orchesella villosa	organic	52	control	6.5	-27.24
Orchesella villosa	organic	52	control	2.84	-25.84
Orchesella villosa	conventional	58	roof	0.21	-25.72
Orchesella villosa	conventional	58	roof	-1.32	-25.95
Orchesella villosa	conventional	58	control	1.25	-26.21
Orchesella villosa	conventional	58	control	0.81	-26.44
Orchesella villosa	conventional	58	control	1.12	-32.53
Orchesella villosa	organic	86	control	5.76	-27.25
Orchesella villosa	organic	8	roof	5.84	-27.56
Orchesella villosa	organic	8	roof	6.9	-25.98
Orchesella villosa	organic	8	roof	8.31	-26.59
Orchesella villosa	conventional	92	roof	0.65	-27.51
Orchesella villosa	conventional	92	control	0.1	-28.33
Scheloribates laevigatus	conventional	2	roof	5.17	-25.72
Scheloribates laevigatus	conventional	2	roof	2.99	-26.52
Scheloribates laevigatus	conventional	2	control	4.82	-25.79
Scheloribates laevigatus	conventional	42	roof	3.62	-25.82
Scheloribates laevigatus	conventional	42	roof	4.76	-26.49
Scheloribates laevigatus	conventional	42	control	4.06	-24.08
Scheloribates laevigatus	organic	48	roof	8.26	-27.48
Scheloribates laevigatus	organic	48	control	5.67	-25.22
Scheloribates laevigatus	organic	52	roof	8.64	-26.36
Scheloribates laevigatus	organic	52	roof	8.32	-26.26
Scheloribates laevigatus	organic	52	roof	7.53	-26.43
Scheloribates laevigatus	organic	52	control	7.94	-24.74
Scheloribates laevigatus	organic	52	control	7.71	-24.93
Scheloribates laevigatus	conventional	58	roof	2.82	-26.72
Scheloribates laevigatus	conventional	58	control	4.37	-23.64
Scheloribates laevigatus	organic	86	roof	7.78	-26.91
Scheloribates laevigatus	organic	86	control	7.3	-22.78
Scheloribates laevigatus	organic	86	control	7.3	-24.74
Scheloribates laevigatus	organic	8	roof	6.53	-26.44
Scheloribates laevigatus	organic	8	roof	7.53	-26.26
Scheloribates laevigatus	organic	8	control	7.72	-26.21
Scheloribates laevigatus	organic	8	control	7.92	-25.99
Scheloribates laevigatus	conventional	92	roof	2.82	-26.31
Scheloribates laevigatus	conventional	92	control	5.15	-25.54
Tectocepheus sarakensis	conventional	2	roof	0.92	-26.33
Tectocepheus sarakensis	conventional	2	roof	0.37	-26.21
Tectocepheus sarakensis	conventional	2	control	1.18	-25.26
Tectocepheus sarakensis	conventional	42	roof	1.92	-25.7
Tectocepheus sarakensis	conventional	42	roof	-1.96	-25.82
Tectocepheus sarakensis	conventional	42	control	-0.01	-25.44
Tectocepheus sarakensis	conventional	42	control	0.56	-26.01
Tectocepheus sarakensis	organic	48	roof	5.62	-25.33
Tectocepheus sarakensis	organic	48	control	-2.22	-24.84
Tectocepheus sarakensis	organic	52	roof	1.56	-23.95
Tectocepheus sarakensis	organic	52	roof	5.6	-24.65
Tectocepheus sarakensis	organic	52	control	3.39	-24.87
Tectocepheus sarakensis	conventional	58	roof	13.63	-25.2
Tectocepheus sarakensis	conventional	58	control	2.78	-24.91
Tectocepheus sarakensis	organic	86	roof	5.78	-23.28
Tectocepheus sarakensis	organic	86	control	5.63	-24.12
Tectocepheus sarakensis	organic	86	control	3.17	-23.6
Tectocepheus sarakensis	organic	86	control	4.54	-23.8
Tectocepheus sarakensis	organic	8	roof	4.21	-24.96
Tectocepheus sarakensis	organic	8	roof	5.48	-23.77
Tectocepheus sarakensis	organic	8	control	4.78	-23.48
Tectocepheus sarakensis	conventional	92	roof	0.09	-24.51
Tectocepheus sarakensis	conventional	92	control	1.44	-25.02
Tectocepheus sarakensis	conventional	92	control	1.01	-25.22

## Sheet: stable isotopes wheat
Species	Farming system	Field	Drought	d13C	d15N
Triticum aestivum	biodyn	8	R	-29.65	3825
Triticum aestivum	biodyn	48	R	-29598	4512
Triticum aestivum	biodyn	52	R	-29501	4211
Triticum aestivum	biodyn	86	R	-29827	4509
Triticum aestivum	biodyn	8	RC	-29454	3811
Triticum aestivum	biodyn	48	RC	-29714	4556
Triticum aestivum	biodyn	52	RC	-29754	3918
Triticum aestivum	biodyn	86	RC	-29821	4566
Triticum aestivum	conmin	2	R	-28956	-0.329
Triticum aestivum	conmin	42	R	-29288	-1112
Triticum aestivum	conmin	58	R	-29881	-1075
Triticum aestivum	conmin	92	R	-29194	-0.125
Triticum aestivum	conmin	2	RC	-29398	0.484
Triticum aestivum	conmin	42	RC	-29084	-0.275
Triticum aestivum	conmin	58	RC	-29473	0.812
Triticum aestivum	conmin	92	RC	-29441	-0.632
